# Supplementary material
Source: PubMed Central journal article supplement (PMC3914617)
Supplement: 2b1b5a28e2c03aa0d1f4631faf11d18a_genetics.113.158279-7.pdf [file 2b1b5a28e2c03aa0d1f4631faf11d18a_genetics.113.158279-7.pdf]

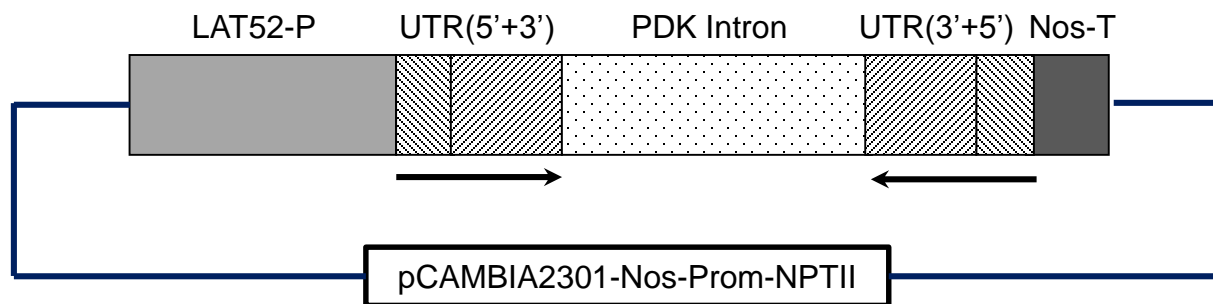

**Figure S1** Diagram of the *CUL1* RNAi construct. LAT52-P, pollen specific promoter; UTR (5'+3'), combined UTR regions of *CUL1* gene; Nos-T, nos terminator; pCAMBIA2301-Nos-Prom-NPTII, modified binary vector pCAMBIA2301.
