# Supplementary material
Source: PubMed Central journal article supplement (PMC3914617)
Supplement: 7ed034943ec1cf90f9e1c883da70da1e_genetics.113.158279-6.pdf [file 7ed034943ec1cf90f9e1c883da70da1e_genetics.113.158279-6.pdf]

**Table S1 Primers used to build the RNAi construct and genotype the transgenic lines.** Restriction sites are underlined, and sequences that overlap with adjacent primers for overlap extension PCR are underlined with a wavy line.

| Primer     | Sequence (5'-3')                                         | Restriction Enzyme |
|------------|----------------------------------------------------------|--------------------|
| 5UTR-1F    | <u>CACCAAAAAAAAAAATTCCAATTTAACCAAAATGCAACCGAATTCGACG</u> |                    |
| 5UTR-1R    | <u>CGAGGTATGAGATCAGCACCTCGGAAAATTCTTGTTAACACGAT</u>      |                    |
| 3UTR-1F    | <u>TGTTAACAAGAATTTTCCGAGGGTGCTGATCTCATACCTCGG</u>        |                    |
| 3UTR-1R    | GTAATGTTGGCATTACTGCAACCA                                 |                    |
| LAT52-2F   | TCTATG <u>GAGCTCGGATAAGGGTAGCTCT</u>                     | <i>Sac</i> I       |
| LAT52-2R   | <u>TCGAATTCGGTTGCATTTTGGTTAAATTGGAATTTTTTTTTTGGTG</u>    |                    |
| 3UTR-3R    | GTACGGGGT <u>ACCGTAAATGTTGGCATTACTGCAACCA</u>            | <i>Kpn</i> I       |
| 3UTR-2R    | TTCGCGGATCCGTAATGTTGGCATTACTGCAACCA                      | <i>Bam</i> H I     |
| 5UTR-2F    | GTCTATGGGT <u>CACCACCAAAATGCAACCGAATTCGACG</u>           | <i>Bst</i> E II    |
| Nos-Prom-F | TCTATG <u>CCAACATGGTGGGATCATGAGCGAGAATTAAGGGA</u>        | <i>Bst</i> X I     |
| NPTII-R    | TTCGCCTCGAGTCAGAAGAACTCGTCAAGAAGGCCA                     | <i>Xho</i> I       |
| Cul-1F     | ATCAGGAACGTGAGGGTGAG                                     |                    |
| Cul-1R     | CAGCAAAACAGCCTTTCACA                                     |                    |
| 2301-2     | CCAGGCTTTACTTTATGCTTC                                    |                    |
| LAT52M-R   | TGCTCCTTCTTTGTGTGTGT                                     |                    |
