# Supplementary material
Source: PubMed Central journal article supplement (PMC3914617)
Supplement: 84bb3b8263c29bb8768c544d383aa002_genetics.113.158279-5.pdf [file 84bb3b8263c29bb8768c544d383aa002_genetics.113.158279-5.pdf]

**Table S2 Segregation through the pollen of the *CUL1* RNAi T-DNA.** Five independent transformants (T<sub>0</sub>-1 to -5) were crossed as pollen donors onto SC and SI accessions of *S. arcanum* (LA2157 and LA2163, respectively). T<sub>1</sub> progeny arrays from three independent LA2163 plants (LA2163-1, -2, -3 or -4) were analyzed. Chi-square goodness-of-fit statistics (df = 1, with Yates correction factor) were used to test for deviations from the expected 1:1 (single T-DNA insertion) or 3:1 (two insertions) ratios.

| Cross (♀ × ♂)                | No. Plants<br>+ : - TDNA | Total | % Transgenic<br>Progeny | Ratio<br>Tested | χ <sup>2</sup> | P value |
|------------------------------|--------------------------|-------|-------------------------|-----------------|----------------|---------|
| LA2157 × T <sub>0</sub> -1   | 71 : 25                  | 96    | 74.0                    | 3:1             | 0.01           | 0.92    |
| LA2163-1 × T <sub>0</sub> -1 | 6 : 42                   | 48    | 12.5                    | 3:1             | 96.7           | <0.0001 |
| LA2163-2 × T <sub>0</sub> -1 | 7 : 41                   | 48    | 14.3                    | 3:1             | 90.3           | <0.0001 |
| LA2163-3 × T <sub>0</sub> -1 | 2 : 46                   | 48    | 4.2                     | 3:1             | 124.8          | <0.0001 |
| LA2157 × T <sub>0</sub> -2   | 42 : 54                  | 96    | 43.8                    | 1:1             | 1.26           | 0.26    |
| LA2163-1 × T <sub>0</sub> -2 | 17 : 79                  | 96    | 17.7                    | 1:1             | 38.8           | <0.0001 |
| LA2163-2 × T <sub>0</sub> -2 | 12 : 84                  | 96    | 12.5                    | 1:1             | 52.5           | <0.0001 |
| LA2163-3 × T <sub>0</sub> -2 | 0 : 96                   | 96    | 0                       | 1:1             | 94.0           | <0.0001 |
| LA2157 × T <sub>0</sub> -3   | 64 : 80                  | 144   | 44.4                    | 1:1             | 1.56           | 0.2117  |
| LA2163-1 × T <sub>0</sub> -3 | 2 : 46                   | 48    | 4.2                     | 1:1             | 38.5           | <0.0001 |
| LA2163-2 × T <sub>0</sub> -3 | 4 : 44                   | 48    | 8.3                     | 1:1             | 31.7           | <0.0001 |
| LA2163-3 × T <sub>0</sub> -3 | 0 : 48                   | 48    | 0                       | 1:1             | 46.0           | <0.0001 |
| LA2157 × T <sub>0</sub> -4   | 50 : 46                  | 96    | 52.1                    | 1:1             | 0.1            | 0.7518  |
| LA2163-1 × T <sub>0</sub> -4 | 6 : 42                   | 48    | 12.5                    | 1:1             | 25.5           | <0.0001 |
| LA2163-2 × T <sub>0</sub> -4 | 2 : 46                   | 48    | 4.2                     | 1:1             | 38.5           | <0.0001 |
| LA2163-3 × T <sub>0</sub> -4 | 0 : 48                   | 48    | 0                       | 1:1             | 46.0           | <0.0001 |
| LA2157 × T <sub>0</sub> -5   | 62 : 82                  | 144   | 43.1                    | 1:1             | 2.5            | 0.1138  |
| LA2163-2 × T <sub>0</sub> -5 | 5 : 43                   | 48    | 10.4                    | 1:1             | 28.5           | <0.0001 |
| LA2163-3 × T <sub>0</sub> -5 | 0 : 48                   | 48    | 0                       | 1:1             | 46.0           | <0.0001 |
| LA2163-4 × T <sub>0</sub> -5 | 2 : 46                   | 48    | 4.2                     | 1:1             | 38.5           | <0.0001 |
