# Supplementary material
Source: PubMed Central journal article supplement (PMC3914617)
Supplement: 6372d4b59c265bdcb0acb3634fd83190_genetics.113.158279-4.pdf [file 6372d4b59c265bdcb0acb3634fd83190_genetics.113.158279-4.pdf]

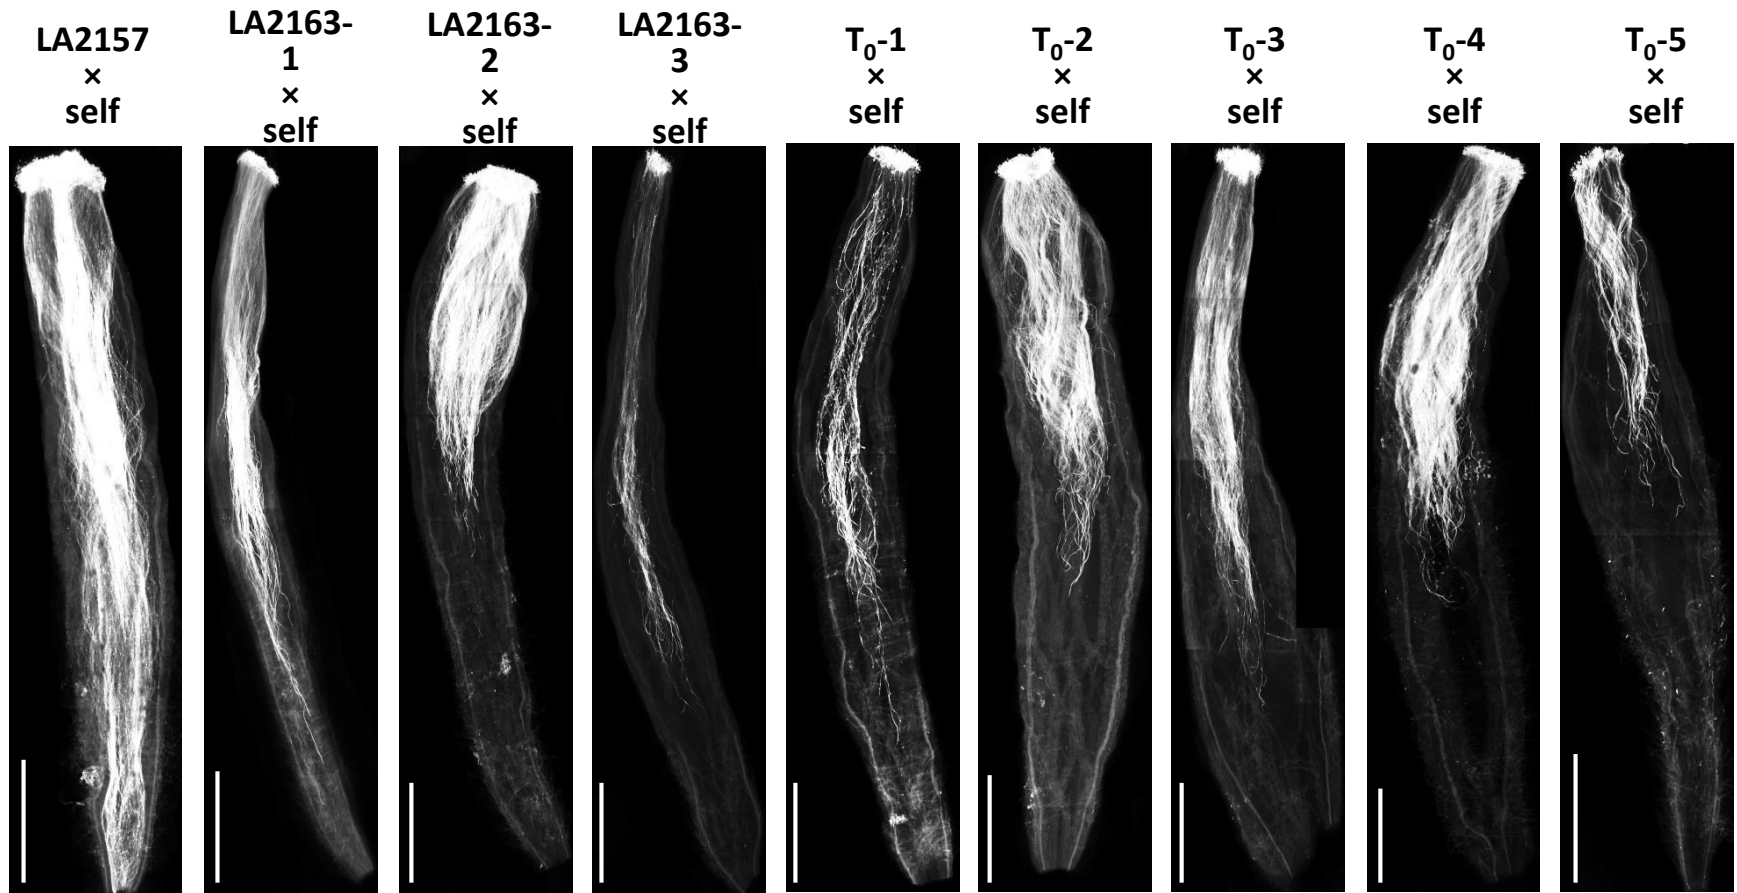

**Figure S2** Images of pollen tube growth in pistils after self-pollinations. Left to right: LA2157, several independent non-transgenic LA2163 plants, and five independent  $T_0$  *CUL1* RNAi transformants. Styles were fixed 24 hours after pollination and pollen tubes were stained with aniline blue and visualized under UV light. Scale bar is 1 mm.h
