# Supplementary material
Source: PubMed Central journal article supplement (PMC3914617)
Supplement: d589964cf1af8ac7fe6e2c9fcef01035_genetics.113.158279-3.pdf [file d589964cf1af8ac7fe6e2c9fcef01035_genetics.113.158279-3.pdf]

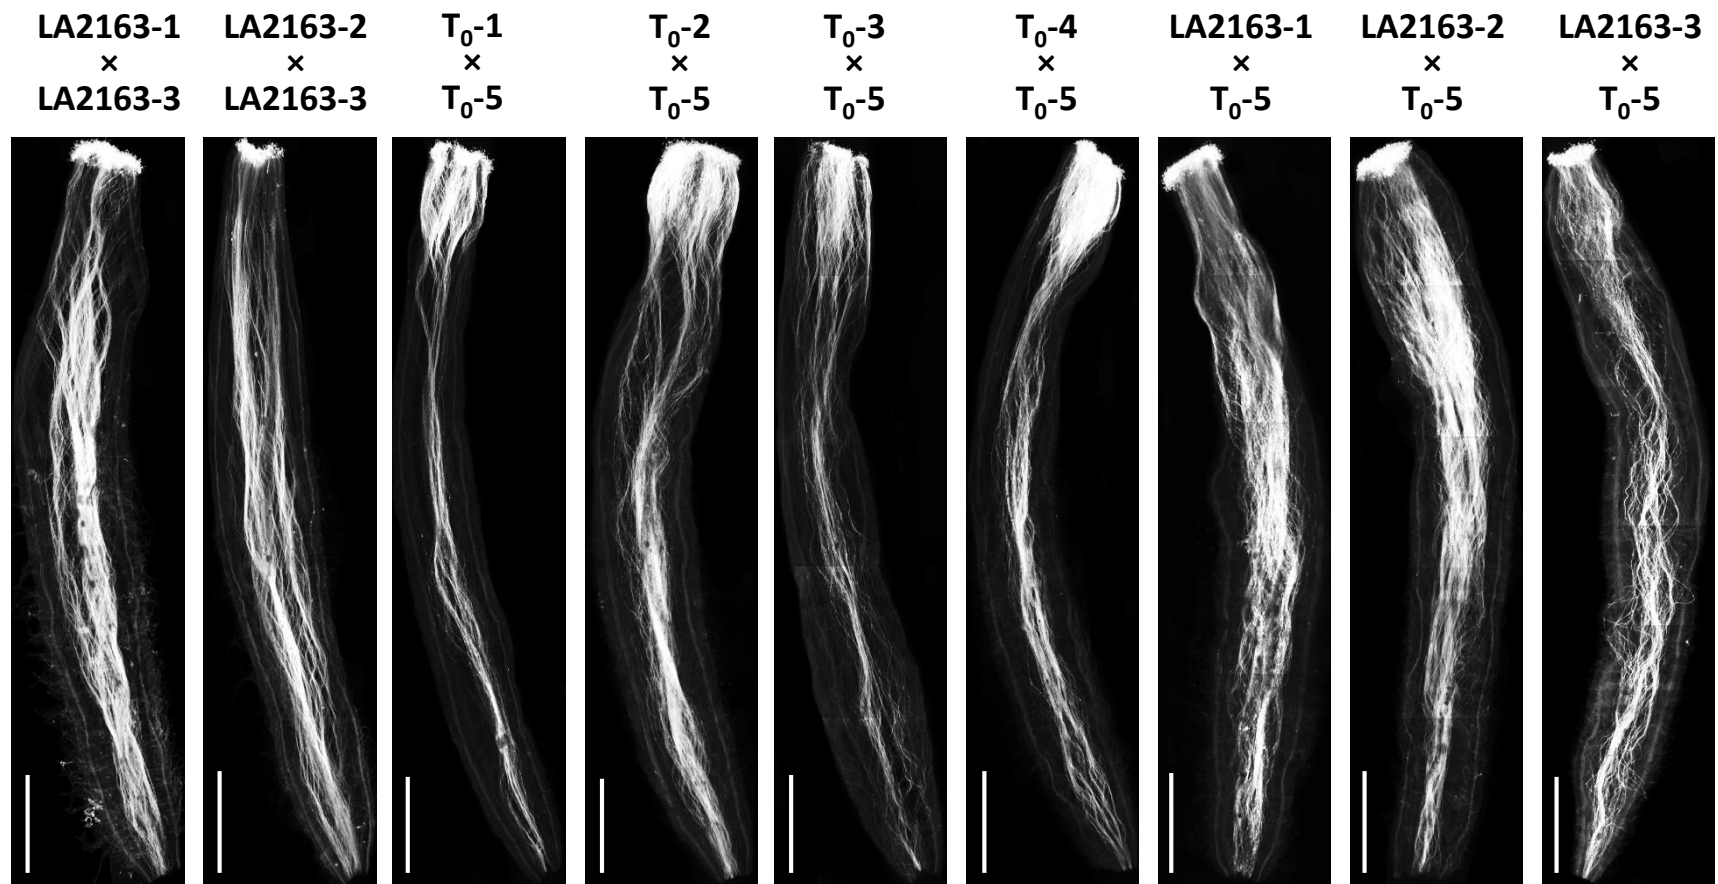

**Figure S3** Images of pollen tube growth in pistils after cross pollinations. Left to right: crosses between independent non-transgenic LA2163 plants, crosses between independent T<sub>0</sub> *CUL1* RNAi transformants, and crosses of T<sub>0</sub> plants onto non-transgenic LA2163 pistils. Styles were fixed 24 hours after pollination and pollen tubes were stained with aniline blue and visualized under UV light. Scale bar is 1 mm.
